# Supplementary material for: Path and site effects deduced from transfrontier internet macroseismic data of two recent M4 earthquakes in NW Europe
Source: Copernicus journal article supplement (doi:10.5194/se-2016-150), 2016-11-09
Supplement: Supplementary file 1 [file VanNotenetal_supplementary material_READ ME.pdf › VanNotenetal_supplementary material_READ ME.pdf]

# Path and site effects deduced from transfrontier internet macroseismic data of two recent M4 earthquakes in NW Europe

Koen Van Noten<sup>1</sup>, Thomas Lecocq<sup>1</sup>, Christophe Sira<sup>2</sup>, Klaus-G. Hinzen<sup>3</sup> and Thierry Camelbeeck<sup>1</sup>

1 Royal Observatory of Belgium, Seismology-Gravimetry, Ringlaan 3, B-1180 Brussels, Belgium  
2 French Central Seismological Office, University of Strasbourg, Rue René Descartes 5, 67084 Strasbourg Cedex, France

3 University of Cologne, Bensberg Erdbebenstation, Vinzenz-Pallotti-Strasse 26, D-51429 Bergisch Gladbach, Germany

Correspondance to: Koen Van Noten ([koen.vannoten@gmail.com](mailto:koen.vannoten@gmail.com))

## Supplementary material:

The supplementary material contains several shapefiles that can be used to regenerate Figures 6B and 10 in the paper.

1. *Goch/Ramsgate epicentre*: Epicentre location shapefiles of the 2011 Goch and 2015 Ramsgate earthquakes based on the ROB-BNS and BGS solutions, respectively.
2. *Goch Grid Cell Intensity Map*: Shapefile of the 2011 Goch earthquake grid cell intensity map including number of merged responses from all institutions per grid cell (PNTCNT) and mean intensities (CII\_mean). To colour the grid cells in a similar way as in Figure 6B, use the *Grid cell intensity color scale QGIS.qml* in QGIS.
3. *Ramsgate Grid Cell Intensity Map*: Shapefile of the 2015 Ramsgate earthquake grid cell intensity map including the mean intensities (CII\_mean) per grid cell. To colour the grid cells in a similar way as in Figure 10, use the *Grid cell intensity color scale QGIS.qml* in QGIS.
4. *Grid cell intensity color scale QGIS.qml*: QGIS Layer Style File with Intensity Colours. Apply the Layer Style File to the 2011 Goch and 2015 Ramsgate shapefiles in QGIS to colour the grid cell intensity maps in a similar way as in Figures 6B and 10.
5. *Border Faults LRG*: Lower Rhine Graben border faults shapefile after Vanneste, K., Camelbeeck, T., and Verbeeck, K. 2013. A Model of Composite Seismic Sources for the Lower Rhine Graben, Northwest Europe, *Bulletin of the Seismological Society of America*, **103**, 984-1007.
